# Supplementary material for: Distinct New York City Aedes albopictus Mosquito Populations Display Differences in Salivary Gland Protein D7 Diversity and Chikungunya Virus Replication
Source: MDPI journal article supplement (doi:10.3390/v12070698), 2020-06-28
Supplement: s1 [file s1]

A.

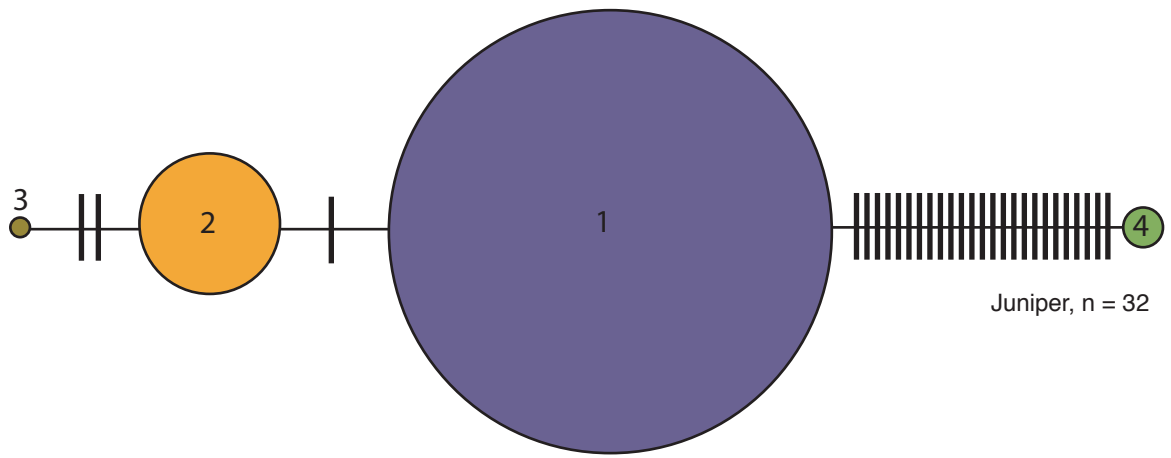

B.

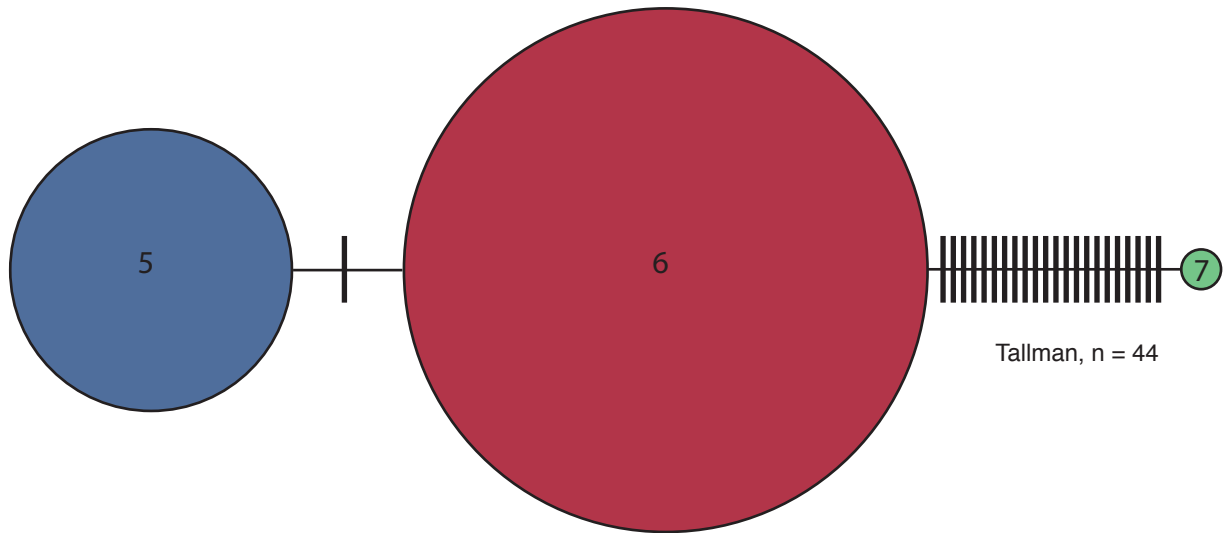

C.

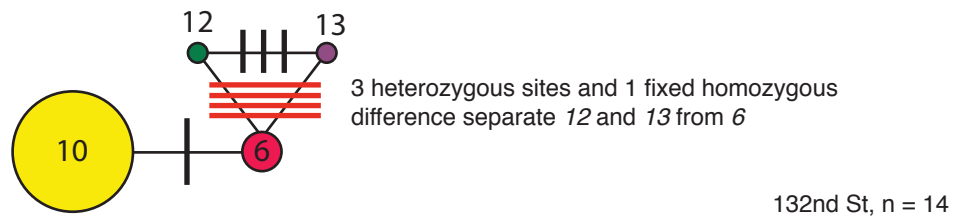

**Figure S1. Haplotypes present in individual mosquito populations.** Haplotype network of alleles found in (A) Juniper, (B) Tallman, and (C) W. 132nd street. Size of circles is representative of number of specific allele found in population. Small black and red bars indicate 1 nucleotide difference between alleles.

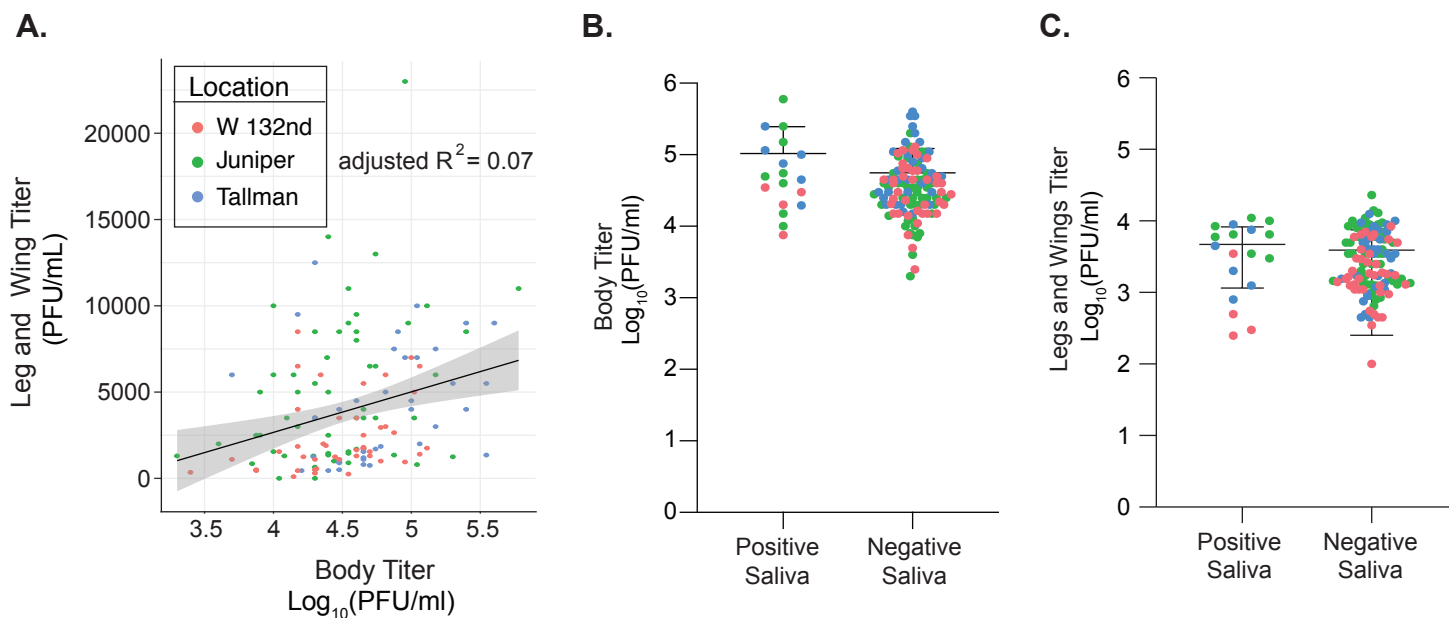

**Supplemental Figure 2. Saliva titers are not correlated to body or leg and wing titers in NYC *Ae.albopictus*.**

(A) The linear correlation between body and leg and wing titers is shown ( $p$ -value  $< 0.01$ ). The gray area represents the 95 percent confidence interval from the linear model. (B) Body titers of mosquitoes that had infectious saliva is compared to those that did not (Welch's  $t$ -test,  $p > 0.05$ ). Similarly in (C) Leg and wing titers of mosquitoes that had infectious saliva is compared to those that did not (Welch's  $t$ -test,  $p > 0.05$ ).

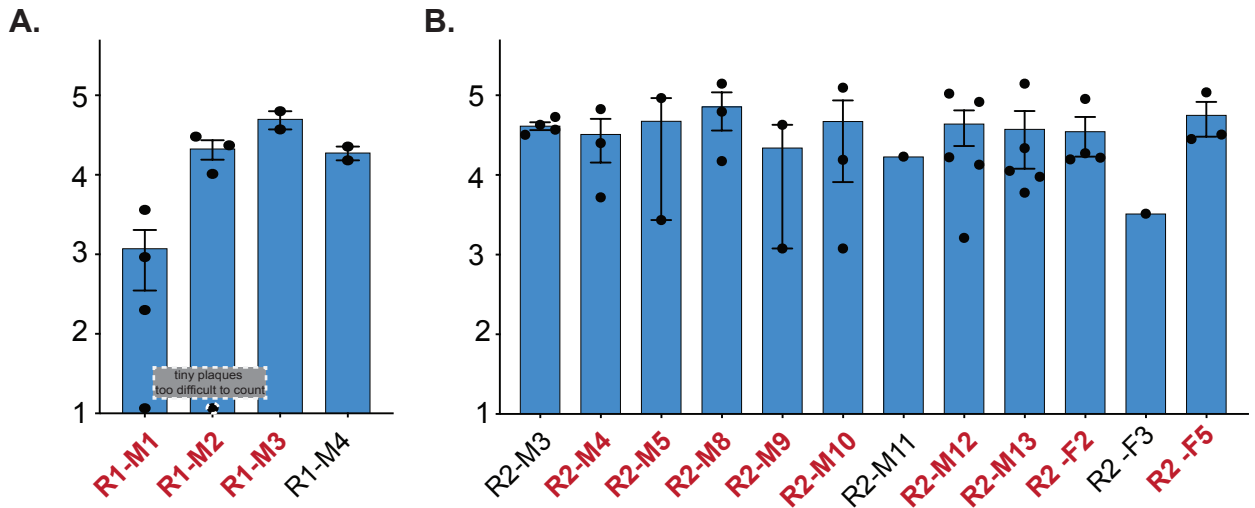

**Supplemental Figure 3. Mosquitoes used in transmission experiment were infected with chikungunya virus.** Mosquitoes were fed an artificial blood meal spiked with chikungunya virus, and engorged mosquitoes were sorted. 7 to 11 days post infection these mosquitoes were allowed to feed on mice. Each mouse was exposed to 1 to 5 mosquitoes. Each dot represents the titer in a single mosquito body determined by plaque assay after feeding on the mice. The mice highlighted in red were successfully infected. (A) replicate 1 and (B) replicate 2.

**Table S1:** Primers used in this study

| Method / Purpose                                       | Forward (5' - 3')        | Reverse (5' - 3')          |
|--------------------------------------------------------|--------------------------|----------------------------|
| qPCR/ quantify CHIKV genomes                           | TCACTCCCTGCTGGACTTGATAGA | TTGACGAACAGAGTTAGGAACATACC |
| PCR/ <i>Ae. albopictus</i> 18S fragment                | GGTCGGCGCGGTCGTAGTGTGG   | TCCTGGTGGTGCCCTTCGTCAAT    |
| PCR/ CHIKV E1 fragment                                 | CAACGAGCCGTATAAGTATTGG   | CCCTTTGAACTACTTCTGT        |
| PCR/ CHIKV structural region, fragment 1               | TTAAACTGGGCAAACCGC       | GCCTCTGGTATGTGGCCGC        |
| PCR/ CHIKV structural region, fragment 2               | CAACGAGCCGTATAAGTATTGG   | CCCTTTGAACTACTTCTGT        |
| PCR and Sequencing/ <i>Ae. albopictus</i> D7 long form | CGGGACGTGAAGGAAAAATCG    | TTGAGCCTGAACTTTTGCATC      |

| Sequencing Primers for CHIKV E1 | 5' - 3'                |
|---------------------------------|------------------------|
| for fragment 1                  | GAGGCCGGTTCACCATCC     |
|                                 | GTTTCCTCCGGTTCCTTTTC   |
|                                 | GAACGACAGACGGGACG      |
|                                 | CAACGAGCCGTATAAGTATTGG |
| for fragment 2                  | GAACGAGCAGCAACCTTG     |
|                                 | TCTCCGTACGTGAAGTGCTG   |
|                                 | GCCCTCTTTAACGGACATG    |
|                                 | CATGGTCGCCGTTTGCATA    |

**Table S2:** Statistical analysis of infection, dissemination, and transmission rates by Fisher's exact test.

| Populations Compared | High Dose - 7 day Infection  |                    |                   |
|----------------------|------------------------------|--------------------|-------------------|
|                      | Infection Rate               | Dissemination Rate | Transmission Rate |
| Juniper v. Tallman   | not sig                      | not sig            | not sig           |
| Juniper v. 132nd St  | not sig                      | not sig            | not sig           |
| Tallman v. 132nd St  | not sig                      | not sig            | not sig           |
| Populations Compared | High Dose - 14 day Infection |                    |                   |
|                      | Infection Rate               | Dissemination Rate | Transmission Rate |
| Juniper v. Tallman   | p = 0.001                    | not sig            | not sig           |
| Juniper v. 132nd St  | p = 0.016                    | not sig            | not sig           |
| Tallman v. 132nd St  | not sig                      | not sig            | n/a, 0 v. 0       |

| Populations Compared                  | Low Dose - 7 day |                    |
|---------------------------------------|------------------|--------------------|
|                                       | Infection Rate   | Dissemination Rate |
| Juniper v. Aegypti                    | not sig          | not sig            |
| Juniper High Dose v. Juniper Low Dose | p < 0.001        | p = 0.012          |

**Table S3:** Number of mosquitoes used in each experiment.

| Location | Day 7<br>Replicate 1 | Day 7<br>Replicate 2 | Day 14<br>Replicate 1 | Day 14<br>Replicate 2 | Low Dose<br>Replicate 1 | Low Dose<br>Replicate 2 |
|----------|----------------------|----------------------|-----------------------|-----------------------|-------------------------|-------------------------|
| Juniper  | 31                   | 25                   | 18                    | 19                    | 21                      | 17                      |
| Tallman  | 17                   | 23                   | 20                    | 19                    |                         |                         |
| W 132nd  | 28                   | 15                   | 17                    | 12                    |                         |                         |
| Aegypti  |                      |                      |                       |                       | 26                      | 18                      |
